# Supplementary material for: Genome‐Wide MicroRNA Analysis of Peripheral Blood Mononuclear Cells Reveals Elevated miR‐142‐3p Expression as a Potential Biomarker for Secondary Syphilis
Source: Hindawi journal article supplement (doi:10.1155/2021/5520053), 2021-01-01
Supplement: f1 [file 5520053.f1.pdf]

**Supplementary table 1 Differential expression miRNAs between healthy controls and secondary syphilis patients (MicroRNAs chip analysis was performed in 6 healthy controls and 6 untreated secondary syphilis patients).**

| Transcript Cluster ID | Transcript ID(Array Design) | Accession    | Sample Bi-weight Avg Signal (log2) | Control Bi-weight Avg Signal (log2) | Sample Standard Deviation | Control Standard Deviation | Fold Change (linear) (Sample vs. Control) | ANOVA p-value (Sample vs. Control) | FDR p-value (Sample vs. Control) |
|-----------------------|-----------------------------|--------------|------------------------------------|-------------------------------------|---------------------------|----------------------------|-------------------------------------------|------------------------------------|----------------------------------|
| 20501285              | hsa-miR-326                 | MIMAT0000756 | 3.62                               | 1.66                                | 0.96                      | 0.88                       | 3.9                                       | 0.03572                            | 0.783209                         |
| 20500750              | hsa-miR-142-3p              | MIMAT0000434 | 4.49                               | 2.57                                | 1.11                      | 1.28                       | 3.77                                      | 0.019752                           | 0.783209                         |
| 20517745              | hsa-miR-4286                | MIMAT0016916 | 4.2                                | 2.44                                | 0.69                      | 1.25                       | 3.39                                      | 0.031679                           | 0.783209                         |
| 20518425              | hsa-miR-3180                | MIMAT0018178 | 3.27                               | 1.56                                | 0.73                      | 0.99                       | 3.27                                      | 0.021688                           | 0.783209                         |
| 20505608              | hsa-miR-675-5p              | MIMAT0004284 | 4.31                               | 2.64                                | 0.89                      | 0.76                       | 3.17                                      | 0.024799                           | 0.783209                         |
| 20525743              | hsa-miR-6891-5p             | MIMAT0027682 | 4.57                               | 3.03                                | 0.4                       | 0.96                       | 2.9                                       | 0.018215                           | 0.783209                         |
| 20500179              | hsa-miR-98-5p               | MIMAT0000096 | 4.6                                | 3.16                                | 0.43                      | 1.09                       | 2.71                                      | 0.006222                           | 0.687402                         |
| 20515637              | hsa-miR-3195                | MIMAT0015079 | 4.05                               | 2.67                                | 0.7                       | 0.78                       | 2.61                                      | 0.010002                           | 0.72094                          |
| 20524053              | hsa-miR-6132                | MIMAT0024616 | 4.12                               | 2.78                                | 0.48                      | 0.54                       | 2.53                                      | 0.004595                           | 0.64955                          |
| 20517744              | hsa-miR-4284                | MIMAT0016915 | 4.71                               | 3.37                                | 0.79                      | 0.7                        | 2.53                                      | 0.013327                           | 0.783209                         |
| 20518893              | hsa-miR-4498                | MIMAT0019033 | 4.08                               | 2.74                                | 0.6                       | 0.63                       | 2.52                                      | 0.015736                           | 0.783209                         |
| 20521785              | hsa-miR-5100                | MIMAT0022259 | 5.63                               | 4.31                                | 0.72                      | 0.84                       | 2.49                                      | 0.049759                           | 0.814413                         |
| 20525683              | hsa-miR-6860                | MIMAT0027622 | 3.28                               | 2                                   | 0.23                      | 0.33                       | 2.43                                      | 0.000016                           | 0.108216                         |
| 20506776              | hsa-miR-1229-5p             | MIMAT0022942 | 3.89                               | 2.63                                | 0.43                      | 0.77                       | 2.4                                       | 0.027029                           | 0.783209                         |
| 20518783              | hsa-miR-378e                | MIMAT0018927 | 2.86                               | 1.61                                | 0.84                      | 0.41                       | 2.37                                      | 0.030974                           | 0.783209                         |
| 20506779              | hsa-miR-1231                | MIMAT0005586 | 3.2                                | 1.98                                | 0.49                      | 0.56                       | 2.34                                      | 0.016718                           | 0.783209                         |
| 20525446              | hsa-miR-6742-5p             | MIMAT0027385 | 2.22                               | 1.03                                | 0.47                      | 0.36                       | 2.29                                      | 0.002179                           | 0.638484                         |

|          |                  |               |      |      |      |      |      |          |          |
|----------|------------------|---------------|------|------|------|------|------|----------|----------|
| 20500143 | hsa-miR-22-5p    | MIMAT0004495  | 4.81 | 3.63 | 0.37 | 0.9  | 2.27 | 0.009742 | 0.72094  |
| 20525023 | hsa-miR-6511a-5p | MIMAT0025478  | 3.52 | 2.35 | 0.64 | 0.59 | 2.26 | 0.013829 | 0.783209 |
| 20518935 | hsa-miR-4534     | MIMAT0019073  | 4.31 | 3.17 | 0.45 | 0.9  | 2.2  | 0.024249 | 0.783209 |
| 20525383 | hsa-miR-6716-5p  | MIMAT0025844  | 2.71 | 1.59 | 0.46 | 0.34 | 2.17 | 0.00083  | 0.411497 |
| 20503885 | hsa-miR-504-3p   | MIMAT0026612  | 3.26 | 2.14 | 0.42 | 0.39 | 2.17 | 0.001215 | 0.473808 |
| 20518825 | hsa-miR-4448     | MIMAT0018967  | 2.04 | 0.92 | 0.64 | 0.37 | 2.16 | 0.01403  | 0.783209 |
| 20518721 | hsa-miR-642b-3p  | MIMAT0018444  | 3.47 | 2.37 | 0.6  | 0.69 | 2.15 | 0.008331 | 0.687402 |
| 20504574 | hsa-miR-454-3p   | MIMAT0003885  | 4.47 | 3.39 | 0.34 | 0.68 | 2.12 | 0.004113 | 0.64955  |
| 20525657 | hsa-miR-6848-5p  | MIMAT0027596  | 3.23 | 2.16 | 0.41 | 0.79 | 2.11 | 0.025499 | 0.783209 |
| 20506837 | hsa-miR-1246     | MIMAT0005898  | 3.72 | 2.65 | 0.72 | 0.7  | 2.09 | 0.022294 | 0.783209 |
| 20529773 | hsa-miR-8063     | MIMAT0030990  | 2.54 | 1.49 | 0.41 | 0.42 | 2.08 | 0.009028 | 0.712666 |
| 20529568 | hsa-miR-7977     | MIMAT0031180  | 6.39 | 5.38 | 0.55 | 0.6  | 2.01 | 0.023619 | 0.783209 |
| 20526861 | hsa-miR-7150     | MIMAT0028211  | 4.28 | 3.29 | 0.39 | 0.74 | 1.98 | 0.030083 | 0.783209 |
| 20512262 | hsa-miR-2277-3p  | MIMAT0011777  | 2.59 | 1.63 | 0.29 | 0.3  | 1.95 | 0.000195 | 0.260306 |
| 20503102 | hsa-miR-484      | MIMAT0002174  | 5.5  | 4.53 | 0.35 | 0.66 | 1.95 | 0.021597 | 0.783209 |
| 20532829 | ENSG00000201009  | ENSG000002015 | 27   | 4.33 | 0.77 | 0.64 | 1.92 | 0.046865 | 0.802171 |
| 20538187 | U46              | U46           | 5.27 | 4.33 | 0.77 | 0.64 | 1.92 | 0.046865 | 0.802171 |
| 20529783 | hsa-miR-8073     | MIMAT0031000  | 2.11 | 1.18 | 0.43 | 0.28 | 1.9  | 0.003145 | 0.64955  |
| 20525701 | hsa-miR-6870-5p  | MIMAT0027640  | 2.15 | 1.27 | 0.36 | 0.38 | 1.84 | 0.001073 | 0.44465  |
| 20525721 | hsa-miR-6880-5p  | MIMAT0027660  | 4.63 | 3.75 | 0.17 | 0.85 | 1.84 | 0.043985 | 0.801082 |
| 20525525 | hsa-miR-6782-5p  | MIMAT0027464  | 3.02 | 2.15 | 0.51 | 0.36 | 1.83 | 0.004344 | 0.64955  |

|          |                 |              |      |      |      |      |      |          |          |
|----------|-----------------|--------------|------|------|------|------|------|----------|----------|
| 20529781 | hsa-miR-8071    | MIMAT0030998 | 2.48 | 1.6  | 0.39 | 0.53 | 1.83 | 0.041156 | 0.79565  |
| 20501159 | hsa-miR-29c-5p  | MIMAT0004673 | 2.5  | 1.65 | 0.69 | 0.46 | 1.81 | 0.032004 | 0.783209 |
| 20525523 | hsa-miR-6781-5p | MIMAT0027462 | 2.44 | 1.61 | 0.54 | 0.33 | 1.78 | 0.015557 | 0.783209 |
| 20515560 | hsa-miR-3147    | MIMAT0015019 | 2.84 | 2.01 | 0.51 | 0.82 | 1.77 | 0.041064 | 0.79565  |
| 20519439 | hsa-miR-4655-5p | MIMAT0019721 | 3.5  | 2.69 | 0.32 | 0.41 | 1.76 | 0.000941 | 0.416034 |
| 20518826 | hsa-miR-4449    | MIMAT0018968 | 3.52 | 2.71 | 0.31 | 0.59 | 1.75 | 0.013577 | 0.783209 |
| 20519609 | hsa-miR-4750-5p | MIMAT0019887 | 3.98 | 3.19 | 0.47 | 0.69 | 1.72 | 0.035613 | 0.783209 |
| 20521810 | hsa-miR-664b-5p | MIMAT0022271 | 2.05 | 1.29 | 0.34 | 0.24 | 1.7  | 0.003842 | 0.64955  |
| 20515624 | hsa-miR-3188    | MIMAT0015070 | 2.13 | 1.38 | 0.45 | 0.27 | 1.68 | 0.007948 | 0.687402 |
| 20500435 | hsa-miR-7-5p    | MIMAT0000252 | 2.13 | 1.42 | 0.58 | 0.23 | 1.63 | 0.01169  | 0.775194 |
| 20538274 | U94             | U94          | 2.04 | 1.36 | 0.48 | 0.37 | 1.6  | 0.033644 | 0.783209 |
| 20509226 | hsa-miR-1909-5p | MIMAT0007882 | 2.33 | 1.65 | 0.5  | 0.25 | 1.6  | 0.036084 | 0.783209 |
| 20500461 | hsa-miR-204-3p  | MIMAT0022693 | 2.45 | 1.79 | 0.38 | 0.57 | 1.59 | 0.028842 | 0.783209 |
| 20518865 | hsa-miR-4478    | MIMAT0019006 | 1.95 | 1.28 | 0.63 | 0.32 | 1.59 | 0.043403 | 0.801082 |
| 20536978 | hsa-mir-4740    | MI0017378    | 1.8  | 1.14 | 0.25 | 0.34 | 1.58 | 0.005339 | 0.680859 |
| 20519556 | hsa-miR-4722-3p | MIMAT0019837 | 2.65 | 2    | 0.53 | 0.26 | 1.57 | 0.028308 | 0.783209 |
| 20515540 | hsa-miR-3136-5p | MIMAT0015003 | 1.71 | 1.06 | 0.29 | 0.27 | 1.56 | 0.006814 | 0.687402 |
| 20505609 | hsa-miR-675-3p  | MIMAT0006790 | 1.98 | 1.34 | 0.33 | 0.35 | 1.56 | 0.010607 | 0.73267  |
| 20519595 | hsa-miR-4743-5p | MIMAT0019874 | 3.77 | 3.14 | 0.41 | 0.55 | 1.55 | 0.01835  | 0.783209 |
| 20501177 | hsa-miR-99b-3p  | MIMAT0004678 | 2.27 | 1.64 | 0.83 | 0.18 | 1.55 | 0.020248 | 0.783209 |
| 20500393 | hsa-miR-196a-5p | MIMAT0000226 | 1.72 | 1.09 | 0.69 | 0.14 | 1.55 | 0.030158 | 0.783209 |

|          |                 |              |      |      |      |      |      |          |          |
|----------|-----------------|--------------|------|------|------|------|------|----------|----------|
| 20515573 | hsa-miR-3154    | MIMAT0015028 | 1.88 | 1.25 | 0.35 | 0.25 | 1.54 | 0.005262 | 0.680859 |
| 20506785 | hsa-miR-1236-5p | MIMAT0022945 | 1.55 | 0.93 | 0.36 | 0.3  | 1.54 | 0.016813 | 0.783209 |
| 20515572 | hsa-miR-3074-3p | MIMAT0015027 | 1.67 | 1.05 | 0.78 | 0.28 | 1.54 | 0.034959 | 0.783209 |
| 20515563 | hsa-miR-3149    | MIMAT0015022 | 1.79 | 1.18 | 0.46 | 0.23 | 1.53 | 0.007558 | 0.687402 |
| 20525453 | hsa-miR-6746-5p | MIMAT0027392 | 2.01 | 1.39 | 0.34 | 0.39 | 1.53 | 0.015704 | 0.783209 |
| 20517832 | hsa-miR-23c     | MIMAT0018000 | 3.2  | 2.59 | 0.42 | 0.66 | 1.53 | 0.038822 | 0.792084 |
| 20532686 | ACA4            | ACA4         | 3.09 | 2.51 | 0.43 | 0.16 | 1.5  | 0.004351 | 0.64955  |
| 20519570 | hsa-miR-4728-5p | MIMAT0019849 | 5.05 | 4.47 | 0.25 | 0.39 | 1.5  | 0.047058 | 0.802171 |
| 20525553 | hsa-miR-6796-5p | MIMAT0027492 | 1.92 | 1.37 | 0.43 | 0.2  | 1.47 | 0.013145 | 0.783209 |
| 20518823 | hsa-miR-4446-3p | MIMAT0018965 | 3.59 | 3.03 | 0.61 | 0.7  | 1.47 | 0.046085 | 0.802069 |
| 20538178 | U42B            | U42B         | 3.05 | 2.5  | 0.58 | 0.24 | 1.46 | 0.014132 | 0.783209 |
| 20525497 | hsa-miR-6768-5p | MIMAT0027436 | 2.05 | 1.5  | 0.39 | 0.3  | 1.46 | 0.037424 | 0.783209 |
| 20519655 | hsa-miR-4776-5p | MIMAT0019932 | 2.28 | 1.73 | 0.57 | 0.52 | 1.46 | 0.040649 | 0.79565  |
| 20504284 | hsa-miR-563     | MIMAT0003227 | 1.89 | 1.35 | 0.31 | 0.17 | 1.45 | 0.003936 | 0.64955  |
| 20517723 | hsa-miR-2355-5p | MIMAT0016895 | 1.34 | 0.8  | 0.35 | 0.17 | 1.45 | 0.010841 | 0.741066 |
| 20517692 | hsa-miR-4312    | MIMAT0016864 | 1.46 | 0.93 | 0.46 | 0.1  | 1.45 | 0.015706 | 0.783209 |
| 20501155 | hsa-miR-194-3p  | MIMAT0004671 | 1.54 | 1    | 0.3  | 0.2  | 1.45 | 0.019279 | 0.783209 |
| 20501183 | hsa-miR-30e-3p  | MIMAT0000693 | 6.46 | 5.94 | 0.24 | 0.28 | 1.43 | 0.006386 | 0.687402 |
| 20538179 | U42B            | U42B         | 5.25 | 4.74 | 0.61 | 0.25 | 1.43 | 0.017591 | 0.783209 |
| 20517749 | hsa-miR-4289    | MIMAT0016920 | 1.73 | 1.21 | 0.24 | 0.31 | 1.43 | 0.037695 | 0.783209 |
| 20535798 | hsa-mir-1229    | MI0006319    | 1.61 | 1.1  | 0.22 | 0.13 | 1.42 | 0.000869 | 0.411497 |

|          |                 |                 |      |      |      |      |      |          |          |
|----------|-----------------|-----------------|------|------|------|------|------|----------|----------|
| 20525735 | hsa-miR-6887-5p | MIMAT0027674    | 1.82 | 1.32 | 0.48 | 0.19 | 1.42 | 0.020113 | 0.783209 |
| 20515623 | hsa-miR-3187-3p | MIMAT0015069    | 1.99 | 1.49 | 0.25 | 0.22 | 1.41 | 0.013919 | 0.783209 |
| 20517709 | hsa-miR-4260    | MIMAT0016881    | 1.4  | 0.92 | 0.19 | 0.24 | 1.4  | 0.006049 | 0.687402 |
| 20505789 | hsa-miR-885-5p  | MIMAT0004947    | 1.87 | 1.38 | 0.36 | 0.3  | 1.4  | 0.028597 | 0.783209 |
| 20534154 | ENSG00000265013 | ENSG00000265013 | 2.43 | 1.95 | 0.14 | 0.17 | 1.39 | 0.000393 | 0.260306 |
| 20534164 | ENSG00000265634 | ENSG00000265634 | 2.43 | 1.95 | 0.14 | 0.17 | 1.39 | 0.000393 | 0.260306 |
| 20534166 | ENSG00000265663 | ENSG00000265663 | 2.43 | 1.95 | 0.14 | 0.17 | 1.39 | 0.000393 | 0.260306 |
| 20534175 | ENSG00000265926 | ENSG00000265926 | 2.43 | 1.95 | 0.14 | 0.17 | 1.39 | 0.000393 | 0.260306 |
| 20534178 | ENSG00000266132 | ENSG00000266132 | 2.43 | 1.95 | 0.14 | 0.17 | 1.39 | 0.000393 | 0.260306 |
| 20534184 | ENSG00000266672 | ENSG00000266672 | 2.43 | 1.95 | 0.14 | 0.17 | 1.39 | 0.000393 | 0.260306 |
| 20511560 | hsa-miR-2116-5p | MIMAT0011160    | 1.36 | 0.88 | 0.28 | 0.24 | 1.39 | 0.008501 | 0.687402 |
| 20504345 | hsa-miR-605-5p  | MIMAT0003273    | 1.8  | 1.32 | 0.26 | 0.25 | 1.39 | 0.011046 | 0.742701 |
| 20537009 | hsa-mir-4767    | MI0017408       | 1.94 | 1.47 | 0.29 | 0.16 | 1.39 | 0.018804 | 0.783209 |
| 20532718 | ACA6            | ACA6            | 4.51 | 4.05 | 0.18 | 0.35 | 1.38 | 0.012005 | 0.783209 |
| 20524052 | hsa-miR-6131    | MIMAT0024615    | 1.62 | 1.16 | 0.17 | 0.31 | 1.38 | 0.018906 | 0.783209 |
| 20519555 | hsa-miR-4722-5p | MIMAT0019836    | 1.47 | 1    | 0.38 | 0.15 | 1.38 | 0.025758 | 0.783209 |
| 20506847 | hsa-miR-1254    | MIMAT0005905    | 1.6  | 1.14 | 0.34 | 0.28 | 1.38 | 0.031717 | 0.783209 |
| 20537087 | hsa-mir-5095    | MI0018001       | 4.14 | 3.68 | 0.25 | 0.43 | 1.38 | 0.031996 | 0.783209 |
| 20533151 | ENSG00000221164 | ENSG00000221164 | 1.39 | 0.93 | 0.18 | 0.11 | 1.37 | 0.000522 | 0.301727 |
| 20519676 | hsa-miR-2467-3p | MIMAT0019953    | 1.92 | 1.46 | 0.38 | 0.29 | 1.37 | 0.049253 | 0.814413 |
| 20500154 | hsa-miR-26b-5p  | MIMAT0000083    | 7.81 | 7.37 | 0.18 | 0.32 | 1.36 | 0.004808 | 0.64955  |

|          |                  |              |       |       |      |      |      |          |          |
|----------|------------------|--------------|-------|-------|------|------|------|----------|----------|
| 20525615 | hsa-miR-6827-5p  | MIMAT0027554 | 1.31  | 0.87  | 0.2  | 0.3  | 1.36 | 0.030136 | 0.783209 |
| 20500141 | hsa-miR-21-5p    | MIMAT0000076 | 9.57  | 9.14  | 0.2  | 0.31 | 1.35 | 0.007067 | 0.687402 |
| 20500741 | hsa-miR-135a-3p  | MIMAT0004595 | 1.71  | 1.28  | 0.28 | 0.14 | 1.35 | 0.008216 | 0.687402 |
| 20536514 | hsa-mir-500b     | MI0015903    | 2.32  | 1.89  | 0.6  | 0.39 | 1.35 | 0.030222 | 0.783209 |
| 20536557 | hsa-mir-3653     | MI0016053    | 3.49  | 3.06  | 0.53 | 0.17 | 1.35 | 0.036902 | 0.783209 |
| 20538115 | SNORD125         | SNORD125     | 3.49  | 3.06  | 0.53 | 0.17 | 1.35 | 0.036902 | 0.783209 |
| 20538049 | hsa-mir-8089     | MI0025925    | 1.44  | 1.01  | 0.33 | 0.15 | 1.34 | 0.020573 | 0.783209 |
| 20536319 | hsa-mir-3199-1   | MI0014247    | 1.18  | 0.76  | 0.22 | 0.25 | 1.34 | 0.037038 | 0.783209 |
| 20536322 | hsa-mir-3199-2   | MI0014248    | 1.18  | 0.76  | 0.22 | 0.25 | 1.34 | 0.037038 | 0.783209 |
| 20536654 | hsa-mir-550b-1   | MI0016686    | 1.79  | 1.37  | 0.31 | 0.14 | 1.33 | 0.026067 | 0.783209 |
| 20536655 | hsa-mir-550b-2   | MI0016687    | 1.79  | 1.37  | 0.31 | 0.14 | 1.33 | 0.026067 | 0.783209 |
| 20519488 | hsa-miR-4684-3p  | MIMAT0019770 | 1.69  | 1.28  | 0.43 | 0.32 | 1.33 | 0.037117 | 0.783209 |
| 20519533 | hsa-miR-4710     | MIMAT0019815 | 3.56  | 3.15  | 0.29 | 0.21 | 1.33 | 0.040642 | 0.79565  |
| 20520351 | hsa-miR-1273g-3p | MIMAT0022742 | 10.73 | 10.33 | 0.31 | 0.26 | 1.33 | 0.046005 | 0.802069 |
| 20505801 | hsa-miR-760      | MIMAT0004957 | 2.11  | 1.71  | 0.1  | 0.39 | 1.32 | 0.033276 | 0.783209 |
| 20500168 | hsa-miR-33a-5p   | MIMAT0000091 | 1.31  | 0.91  | 0.34 | 0.19 | 1.32 | 0.036777 | 0.783209 |
| 20506822 | hsa-miR-1294     | MIMAT0005884 | 1.75  | 1.34  | 0.23 | 0.34 | 1.32 | 0.046018 | 0.802069 |
| 20518901 | hsa-miR-4505     | MIMAT0019041 | 5.98  | 5.58  | 0.19 | 0.24 | 1.31 | 0.009344 | 0.720486 |
| 20537988 | hsa-mir-7845     | MI0025515    | 1.73  | 1.33  | 0.2  | 0.19 | 1.31 | 0.016071 | 0.783209 |
| 20535216 | hsa-mir-507      | MI0003194    | 1.27  | 0.9   | 0.15 | 0.22 | 1.3  | 0.021918 | 0.783209 |
| 20525470 | hsa-miR-6754-3p  | MIMAT0027409 | 1.9   | 1.52  | 0.28 | 0.22 | 1.3  | 0.030048 | 0.783209 |

|          |                 |                 |      |      |      |      |      |          |          |
|----------|-----------------|-----------------|------|------|------|------|------|----------|----------|
| 20519425 | hsa-miR-4646-5p | MIMAT0019707    | 2.07 | 1.68 | 0.46 | 0.26 | 1.3  | 0.037887 | 0.783209 |
| 20534241 | HBII-296B       | HBII-296B       | 1.74 | 1.36 | 0.45 | 0.1  | 1.3  | 0.045545 | 0.801082 |
| 20533544 | ENSG00000238822 | ENSG00000238822 | 1.42 | 1.05 | 0.14 | 0.07 | 1.29 | 0.000141 | 0.260306 |
| 20533805 | ENSG00000251822 | ENSG00000251822 | 1.21 | 0.85 | 0.16 | 0.09 | 1.29 | 0.00191  | 0.633418 |
| 20536467 | hsa-mir-4257    | MI0015856       | 1.25 | 0.89 | 0.28 | 0.15 | 1.29 | 0.032124 | 0.783209 |
| 20536802 | hsa-mir-4522    | MI0016889       | 1.31 | 0.94 | 0.27 | 0.24 | 1.29 | 0.033221 | 0.783209 |
| 20535911 | hsa-mir-1282    | MI0006429       | 1.95 | 1.58 | 0.43 | 0.45 | 1.29 | 0.039836 | 0.79565  |
| 20538105 | SNORA38B        | SNORA38B        | 1.64 | 1.28 | 0.13 | 0.29 | 1.28 | 0.015208 | 0.783209 |
| 20503897 | hsa-miR-510-5p  | MIMAT0002882    | 1.44 | 1.09 | 0.18 | 0.31 | 1.28 | 0.023043 | 0.783209 |
| 20519651 | hsa-miR-4773    | MIMAT0019928    | 1.78 | 1.43 | 0.18 | 0.3  | 1.28 | 0.029244 | 0.783209 |
| 20515539 | hsa-miR-466     | MIMAT0015002    | 1.66 | 1.31 | 0.26 | 0.16 | 1.27 | 0.015123 | 0.783209 |
| 20519670 | hsa-miR-4783-3p | MIMAT0019947    | 1.48 | 1.13 | 0.23 | 0.26 | 1.27 | 0.027111 | 0.783209 |
| 20522042 | hsa-miR-5705    | MIMAT0022499    | 1.35 | 1    | 0.17 | 0.22 | 1.27 | 0.033385 | 0.783209 |
| 20526181 | hsa-miR-7111-3p | MIMAT0028120    | 1.36 | 1.02 | 0.23 | 0.15 | 1.27 | 0.034348 | 0.783209 |
| 20518431 | hsa-miR-3910    | MIMAT0018184    | 2.35 | 2    | 0.59 | 0.55 | 1.27 | 0.04205  | 0.796329 |
| 20525611 | hsa-miR-6825-5p | MIMAT0027550    | 1.56 | 1.22 | 0.39 | 0.16 | 1.27 | 0.044977 | 0.801082 |
| 20537012 | hsa-mir-4770    | MI0017411       | 1.24 | 0.91 | 0.16 | 0.21 | 1.26 | 0.009716 | 0.72094  |
| 20532802 | ENSG00000200496 | ENSG00000200496 | 1.38 | 1.05 | 0.19 | 0.24 | 1.26 | 0.028944 | 0.783209 |
| 20500140 | hsa-miR-20a-3p  | MIMAT0004493    | 1.54 | 1.2  | 0.26 | 0.29 | 1.26 | 0.030193 | 0.783209 |
| 20525503 | hsa-miR-6771-5p | MIMAT0027442    | 5.49 | 5.16 | 0.21 | 0.33 | 1.26 | 0.031331 | 0.783209 |
| 20534242 | HBII-296B       | HBII-296B       | 1.73 | 1.4  | 0.4  | 0.09 | 1.26 | 0.037914 | 0.783209 |

|          |                  |              |      |      |      |      |      |          |          |
|----------|------------------|--------------|------|------|------|------|------|----------|----------|
| 20534510 | hsa-mir-7-3      | MI0000265    | 1.14 | 0.81 | 0.34 | 0.17 | 1.26 | 0.045229 | 0.801082 |
| 20533092 | ENSG00000212445  | ENSG00000212 | 1.18 | 0.84 | 0.27 | 0.23 | 1.26 | 0.046838 | 0.802171 |
| 20538012 | hsa-mir-8054     | MI0025890    | 1.14 | 0.83 | 0.14 | 0.08 | 1.24 | 0.00452  | 0.64955  |
| 20537265 | hsa-mir-6125     | MI0021259    | 2.85 | 2.54 | 0.17 | 0.18 | 1.24 | 0.005627 | 0.687402 |
| 20505965 | hsa-miR-509-3-5p | MIMAT0004975 | 1.34 | 1.03 | 0.27 | 0.18 | 1.24 | 0.010253 | 0.723245 |
| 20534749 | hsa-mir-1-1      | MI0000651    | 1.28 | 0.96 | 0.23 | 0.09 | 1.24 | 0.022943 | 0.783209 |
| 20525445 | hsa-miR-6741-3p  | MIMAT0027384 | 1.21 | 0.9  | 0.21 | 0.22 | 1.24 | 0.027578 | 0.783209 |
| 20506855 | hsa-miR-1261     | MIMAT0005913 | 1.39 | 1.08 | 0.26 | 0.2  | 1.24 | 0.031039 | 0.783209 |
| 20537506 | hsa-mir-6763     | MI0022608    | 1.4  | 1.1  | 0.11 | 0.19 | 1.23 | 0.004792 | 0.64955  |
| 20515513 | hsa-miR-3119     | MIMAT0014981 | 1.22 | 0.93 | 0.08 | 0.18 | 1.23 | 0.006075 | 0.687402 |
| 20532685 | ACA49            | ACA49        | 1.68 | 1.38 | 0.22 | 0.14 | 1.23 | 0.009966 | 0.72094  |
| 20500125 | hsa-let-7f-2-3p  | MIMAT0004487 | 1.05 | 0.75 | 0.11 | 0.19 | 1.23 | 0.018887 | 0.783209 |
| 20536977 | hsa-mir-4739     | MI0017377    | 1.04 | 0.74 | 0.14 | 0.22 | 1.23 | 0.022524 | 0.783209 |
| 20517753 | hsa-miR-4330     | MIMAT0016924 | 1.23 | 0.94 | 0.19 | 0.19 | 1.22 | 0.017875 | 0.783209 |
| 20525703 | hsa-miR-6871-5p  | MIMAT0027642 | 1.62 | 1.33 | 0.22 | 0.26 | 1.22 | 0.024419 | 0.783209 |
| 20519535 | hsa-miR-4711-3p  | MIMAT0019817 | 1.11 | 0.82 | 0.36 | 0.2  | 1.22 | 0.027174 | 0.783209 |
| 20533110 | ENSG00000212551  | ENSG00000212 | 1.41 | 1.13 | 0.27 | 0.2  | 1.22 | 0.037472 | 0.783209 |
| 20533220 | ENSG00000238329  | ENSG00000238 | 1.36 | 1.07 | 0.25 | 0.19 | 1.22 | 0.041922 | 0.796329 |
| 20523013 | hsa-miR-6081     | MIMAT0023706 | 1.09 | 0.81 | 0.19 | 0.17 | 1.22 | 0.045381 | 0.801082 |
| 20536985 | hsa-mir-4746     | MI0017385    | 1.13 | 0.85 | 0.11 | 0.17 | 1.21 | 0.00829  | 0.687402 |
| 20520209 | hsa-miR-5006-3p  | MIMAT0021034 | 1.31 | 1.04 | 0.34 | 0.2  | 1.21 | 0.027159 | 0.783209 |



|          |                 |                 |      |      |      |      |      |          |          |
|----------|-----------------|-----------------|------|------|------|------|------|----------|----------|
| 20538206 | U56             | U56             | 8.4  | 8.13 | 0.19 | 0.2  | 1.21 | 0.040311 | 0.79565  |
| 20533432 | ENSG00000238657 | ENSG00000238657 | 1.2  | 0.94 | 0.1  | 0.11 | 1.2  | 0.004724 | 0.64955  |
| 20536306 | hsa-mir-3188    | MI0014232       | 1.12 | 0.86 | 0.24 | 0.12 | 1.2  | 0.008228 | 0.687402 |
| 20538245 | U73b            | U73b            | 1.43 | 1.17 | 0.21 | 0.1  | 1.2  | 0.018991 | 0.783209 |
| 20525627 | hsa-miR-6833-5p | MIMAT0027566    | 1.58 | 1.31 | 0.25 | 0.11 | 1.2  | 0.034266 | 0.783209 |
| 20504568 | hsa-miR-1323    | MIMAT0005795    | 1.6  | 1.34 | 0.39 | 0.2  | 1.2  | 0.040382 | 0.79565  |
| 20537563 | hsa-mir-6819    | MI0022664       | 2.09 | 1.83 | 0.18 | 0.17 | 1.19 | 0.007447 | 0.687402 |
| 20519406 | hsa-miR-4632-3p | MIMAT0019688    | 1.44 | 1.19 | 0.15 | 0.13 | 1.19 | 0.013517 | 0.783209 |
| 20519448 | hsa-miR-4661-3p | MIMAT0019730    | 1.12 | 0.86 | 0.13 | 0.14 | 1.19 | 0.026639 | 0.783209 |
| 20518833 | hsa-miR-4453    | MIMAT0018975    | 1.12 | 0.87 | 0.15 | 0.11 | 1.19 | 0.032066 | 0.783209 |
| 20532877 | ENSG00000201674 | ENSG00000201674 | 1.09 | 0.84 | 0.21 | 0.14 | 1.19 | 0.032775 | 0.783209 |
| 20534197 | ENSG00000268305 | ENSG00000268305 | 1.09 | 0.84 | 0.21 | 0.14 | 1.19 | 0.032775 | 0.783209 |
| 20500768 | hsa-miR-126-5p  | MIMAT0000444    | 1.23 | 0.97 | 0.46 | 0.19 | 1.19 | 0.032779 | 0.783209 |
| 20534314 | HBII-85-21      | HBII-85-21      | 1.32 | 1.07 | 0.39 | 0.3  | 1.19 | 0.042464 | 0.796329 |
| 20534361 | hsa-mir-21      | MI0000077       | 2.35 | 2.1  | 0.16 | 0.34 | 1.19 | 0.042887 | 0.801082 |
| 20518433 | hsa-miR-3912-5p | MIMAT0027036    | 1.24 | 0.99 | 0.17 | 0.18 | 1.19 | 0.043654 | 0.801082 |
| 20517925 | hsa-miR-3670    | MIMAT0018093    | 1.05 | 0.79 | 0.15 | 0.15 | 1.19 | 0.047408 | 0.803999 |
| 20535243 | hsa-mir-455     | MI0003513       | 1.49 | 1.26 | 0.04 | 0.09 | 1.18 | 0.000361 | 0.260306 |
| 20535699 | hsa-mir-297     | MI0005775       | 1.17 | 0.93 | 0.11 | 0.14 | 1.18 | 0.0078   | 0.687402 |
| 20533016 | ENSG00000207502 | ENSG00000207502 | 1.43 | 1.19 | 0.18 | 0.16 | 1.18 | 0.01345  | 0.783209 |
| 20504392 | hsa-miR-639     | MIMAT0003309    | 1.53 | 1.29 | 0.24 | 0.14 | 1.18 | 0.030223 | 0.783209 |

|          |                  |              |       |       |      |      |      |          |          |
|----------|------------------|--------------|-------|-------|------|------|------|----------|----------|
| 20538224 | U68              | U68          | 4.94  | 4.7   | 0.16 | 0.18 | 1.18 | 0.037574 | 0.783209 |
| 20500713 | hsa-let-7g-5p    | MIMAT0000414 | 11.73 | 11.49 | 0.3  | 0.24 | 1.18 | 0.044646 | 0.801082 |
| 20529144 | hsa-miR-7852-3p  | MIMAT0030427 | 1.63  | 1.39  | 0.4  | 0.25 | 1.18 | 0.04503  | 0.801082 |
| 20533991 | ENSG00000252566  | ENSG00000252 | 1.19  | 0.96  | 0.13 | 0.09 | 1.17 | 0.01393  | 0.783209 |
| 20505741 | hsa-miR-300      | MIMAT0004903 | 1.21  | 0.98  | 0.15 | 0.14 | 1.17 | 0.024226 | 0.783209 |
| 20536800 | hsa-mir-4521     | MI0016887    | 1.53  | 1.31  | 0.19 | 0.12 | 1.17 | 0.027494 | 0.783209 |
| 20532821 | ENSG00000200897  | ENSG00000200 | 1.16  | 0.93  | 0.16 | 0.18 | 1.17 | 0.028115 | 0.783209 |
| 20504401 | hsa-miR-647      | MIMAT0003317 | 0.96  | 0.73  | 0.18 | 0.13 | 1.17 | 0.036433 | 0.783209 |
| 20532626 | ACA16            | ACA16        | 1.98  | 1.76  | 0.22 | 0.23 | 1.17 | 0.044854 | 0.801082 |
| 20536704 | hsa-mir-548ag-2  | MI0016794    | 1.71  | 1.49  | 0.12 | 0.2  | 1.16 | 0.004452 | 0.64955  |
| 20536875 | hsa-mir-4654     | MI0017282    | 1.26  | 1.05  | 0.13 | 0.14 | 1.16 | 0.014733 | 0.783209 |
| 20521781 | hsa-miR-4524b-5p | MIMAT0022255 | 1.31  | 1.1   | 0.21 | 0.08 | 1.16 | 0.017243 | 0.783209 |
| 20532989 | ENSG00000207100  | ENSG00000207 | 1.38  | 1.17  | 0.25 | 0.12 | 1.16 | 0.018713 | 0.783209 |
| 20522026 | hsa-miR-5692a    | MIMAT0022484 | 1.02  | 0.8   | 0.09 | 0.18 | 1.16 | 0.03013  | 0.783209 |
| 20532752 | ENSG00000199769  | ENSG00000199 | 1.17  | 0.95  | 0.18 | 0.14 | 1.16 | 0.037348 | 0.783209 |
| 20537133 | hsa-mir-5191     | MI0018170    | 1.27  | 1.05  | 0.19 | 0.11 | 1.16 | 0.038057 | 0.783705 |
| 20506832 | hsa-miR-1243     | MIMAT0005894 | 1.16  | 0.95  | 0.11 | 0.1  | 1.15 | 0.01022  | 0.723245 |
| 20536571 | hsa-mir-3667     | MI0016068    | 1.5   | 1.29  | 0.16 | 0.14 | 1.15 | 0.013639 | 0.783209 |
| 20520203 | hsa-miR-5003-3p  | MIMAT0021026 | 1.06  | 0.85  | 0.17 | 0.1  | 1.15 | 0.023978 | 0.783209 |
| 20506884 | hsa-miR-1284     | MIMAT0005941 | 1.12  | 0.91  | 0.13 | 0.14 | 1.15 | 0.026446 | 0.783209 |
| 20519572 | hsa-miR-4729     | MIMAT0019851 | 1.02  | 0.83  | 0.16 | 0.11 | 1.15 | 0.027115 | 0.783209 |

|          |                 |              |      |      |      |      |       |          |          |
|----------|-----------------|--------------|------|------|------|------|-------|----------|----------|
| 20504341 | hsa-miR-601     | MIMAT0003269 | 1.28 | 1.08 | 0.31 | 0.12 | 1.15  | 0.033486 | 0.783209 |
| 20525745 | hsa-miR-6892-5p | MIMAT0027684 | 1.34 | 1.14 | 0.2  | 0.14 | 1.15  | 0.034963 | 0.783209 |
| 20534814 | hsa-mir-200a    | MI0000737    | 1.14 | 0.93 | 0.15 | 0.18 | 1.15  | 0.049695 | 0.814413 |
| 20536681 | hsa-mir-548ad   | MI0016770    | 1.24 | 1.06 | 0.08 | 0.15 | 1.14  | 0.007913 | 0.687402 |
| 20537236 | hsa-mir-5739    | MI0019412    | 1.05 | 0.86 | 0.08 | 0.15 | 1.14  | 0.014964 | 0.783209 |
| 20537871 | hsa-mir-7155    | MI0023615    | 1.09 | 0.9  | 0.19 | 0.11 | 1.14  | 0.020428 | 0.783209 |
| 20532672 | ACA42           | ACA42        | 3.27 | 3.08 | 0.18 | 0.21 | 1.14  | 0.029692 | 0.783209 |
| 20536499 | hsa-mir-4278    | MI0015888    | 1.13 | 0.94 | 0.13 | 0.13 | 1.14  | 0.033319 | 0.783209 |
| 20537455 | hsa-mir-6715a   | MI0022548    | 0.98 | 1.05 | 0.06 | 0.06 | -1.05 | 0.013973 | 0.783209 |
| 20536925 | hsa-mir-4694    | MI0017327    | 0.97 | 1.04 | 0.09 | 0.09 | -1.05 | 0.035453 | 0.783209 |
| 20536859 | hsa-mir-4639    | MI0017266    | 0.91 | 1.01 | 0.13 | 0.08 | -1.07 | 0.030293 | 0.783209 |
| 20536486 | hsa-mir-4269    | MI0015875    | 0.81 | 0.94 | 0.11 | 0.19 | -1.09 | 0.018897 | 0.783209 |
| 20537567 | hsa-mir-6823    | MI0022668    | 0.92 | 1.04 | 0.15 | 0.13 | -1.09 | 0.023953 | 0.783209 |
| 20535343 | hsa-mir-599     | MI0003611    | 1.01 | 1.13 | 0.16 | 0.09 | -1.09 | 0.028484 | 0.783209 |
| 20536551 | hsa-mir-3646    | MI0016046    | 1.14 | 1.27 | 0.12 | 0.09 | -1.09 | 0.04128  | 0.795727 |
| 20519648 | hsa-miR-4771    | MIMAT0019925 | 1.02 | 1.16 | 0.11 | 0.15 | -1.1  | 0.015249 | 0.783209 |
| 20519504 | hsa-miR-4693-3p | MIMAT0019785 | 0.99 | 1.21 | 0.11 | 0.21 | -1.17 | 0.036354 | 0.783209 |
| 20536631 | hsa-mir-3925    | MI0016433    | 0.81 | 1.04 | 0.16 | 0.15 | -1.17 | 0.041599 | 0.796329 |
| 20504386 | hsa-miR-633     | MIMAT0003303 | 0.93 | 1.16 | 0.23 | 0.14 | -1.17 | 0.047375 | 0.803999 |
| 20519410 | hsa-miR-4635    | MIMAT0019692 | 0.94 | 1.18 | 0.14 | 0.08 | -1.18 | 0.002949 | 0.64955  |
| 20500478 | hsa-miR-218-5p  | MIMAT0000275 | 0.88 | 1.12 | 0.11 | 0.15 | -1.18 | 0.010487 | 0.731987 |

|          |                 |              |      |      |      |      |       |          |          |
|----------|-----------------|--------------|------|------|------|------|-------|----------|----------|
| 20525009 | hsa-miR-6504-5p | MIMAT0025464 | 0.76 | 1.01 | 0.16 | 0.24 | -1.18 | 0.018393 | 0.783209 |
| 20538034 | hsa-mir-8075    | MI0025911    | 1.69 | 1.92 | 0.14 | 0.22 | -1.18 | 0.025309 | 0.783209 |
| 20535850 | hsa-mir-548f-1  | MI0006374    | 1.06 | 1.3  | 0.12 | 0.24 | -1.18 | 0.042385 | 0.796329 |
| 20537613 | hsa-mir-6867    | MI0022714    | 1.44 | 1.67 | 0.27 | 0.29 | -1.18 | 0.042492 | 0.796329 |
| 20519623 | hsa-miR-4756-3p | MIMAT0019900 | 0.83 | 1.08 | 0.12 | 0.11 | -1.19 | 0.00343  | 0.64955  |
| 20519454 | hsa-miR-4662b   | MIMAT0019736 | 0.96 | 1.21 | 0.1  | 0.2  | -1.19 | 0.005767 | 0.687402 |
| 20537136 | hsa-mir-5194    | MI0018173    | 0.89 | 1.14 | 0.15 | 0.12 | -1.19 | 0.007481 | 0.687402 |
| 20536036 | hsa-mir-2276    | MI0011282    | 1.04 | 1.29 | 0.15 | 0.2  | -1.19 | 0.020439 | 0.783209 |
| 20519621 | hsa-miR-499b-3p | MIMAT0019898 | 1.03 | 1.28 | 0.1  | 0.23 | -1.19 | 0.035402 | 0.783209 |
| 20534500 | hsa-mir-30d     | MI0000255    | 0.84 | 1.11 | 0.16 | 0.17 | -1.2  | 0.014179 | 0.783209 |
| 20537060 | hsa-mir-4802    | MI0017450    | 0.78 | 1.1  | 0.12 | 0.14 | -1.25 | 0.002215 | 0.638484 |
| 20536279 | hsa-mir-3171    | MI0014202    | 0.82 | 1.14 | 0.12 | 0.14 | -1.25 | 0.007009 | 0.687402 |
| 20520217 | hsa-miR-5009-3p | MIMAT0021042 | 0.97 | 1.67 | 0.23 | 0.81 | -1.63 | 0.0396   | 0.79565  |
| 20525655 | hsa-miR-6847-5p | MIMAT0027594 | 2.49 | 3.4  | 0.74 | 0.7  | -1.87 | 0.025767 | 0.783209 |
| 20529134 | hsa-miR-6516-5p | MIMAT0030417 | 3.41 | 4.47 | 0.22 | 0.55 | -2.07 | 0.013613 | 0.783209 |
| 20500156 | hsa-miR-27a-5p  | MIMAT0004501 | 5.28 | 6.38 | 1.35 | 0.37 | -2.14 | 0.039589 | 0.79565  |
| 20500145 | hsa-miR-23a-5p  | MIMAT0004496 | 5.6  | 6.78 | 0.51 | 0.4  | -2.27 | 0.014511 | 0.783209 |

---
