# Supplementary material for: Genome‐Wide MicroRNA Analysis of Peripheral Blood Mononuclear Cells Reveals Elevated miR‐142‐3p Expression as a Potential Biomarker for Secondary Syphilis
Source: Hindawi journal article supplement (doi:10.1155/2021/5520053), 2021-01-01
Supplement: f2 [file 5520053.f2.pdf]

**Supplementary table 2 GO and KEGG enrichment analysis.**

| Category         | Term                                                                                | Count | %     | PValue | Genes                                                                                                                                                                                                             | List Total | Pop Hits | Pop Total | Fold Enrichment | Bonferroni | Benjamini | FDR   |
|------------------|-------------------------------------------------------------------------------------|-------|-------|--------|-------------------------------------------------------------------------------------------------------------------------------------------------------------------------------------------------------------------|------------|----------|-----------|-----------------|------------|-----------|-------|
| GOTERM_BP_DIRECT | GO:000635<br>1~transcription, DNA-templated                                         | 30    | 18.63 | 0.00   | CCNT2, BCLAF1, ZNF676, ZNF367, ZEB2, NR3C1, ZEB1, NR2C1, PCGF3, ZNF682, PSIP1, NR2F6, PATZ1, GFI1, KDM5C, ATF7IP, KAT7, ZBTB20, RARG, ARID5B, ZBTB41, PPP1R10, ARNTL, RLF, BAZ1A, ATXN7, BNC2, JMJD1C, LCOR, RERE | 149        | 1955     | 16792     | 1.73            | 0.96       | 0.80      | 5.08  |
| GOTERM_BP_DIRECT | GO:000635<br>5~regulation of transcription, DNA-templated                           | 22    | 13.66 | 0.02   | KAT7, RREB1, AFF4, ZBTB41, ZNF676, SOX5, NR3C1, AFF1, ARNTL, HMGA2, NR2C1, RLF, PCGF3, BAZ1A, ZNF682, BNC2, PSIP1, PATZ1, JMJD1C, GFI1, ERC1, LCOR                                                                | 149        | 1504     | 16792     | 1.65            | 1.00       | 0.76      | 30.97 |
| GOTERM_BP_DIRECT | GO:004594<br>4~positive regulation of transcription from RNA polymerase II promoter | 20    | 12.42 | 0.00   | CCNT2, ARHGEF2, RARG, STRN3, ZEB2, NR3C1, ZEB1, ARNTL, HMGA2, NFATC2IP, RLF, PHIP, TET3, ATXN7, ASH1L, FOXF2, ARF4, PSIP1, TNKS, RERE                                                                             | 149        | 981      | 16792     | 2.30            | 0.63       | 0.63      | 1.59  |
| GOTERM_BP_DIRECT | GO:000012<br>2~negative regulation of transcription                                 | 14    | 8.70  | 0.01   | ATF7IP, XP01, ZBTB20, RARG, RREB1, STRN3, ARID5B, NR2F6, ZEB2, ZEB1, GFI1, HMGA2, RERE, NR2C1                                                                                                                     | 149        | 720      | 16792     | 2.19            | 1.00       | 0.75      | 16.31 |

|                  |                                                     |    |      |      |                                                                                    |     |     |       |      |      |      |       |
|------------------|-----------------------------------------------------|----|------|------|------------------------------------------------------------------------------------|-----|-----|-------|------|------|------|-------|
| GOTERM_BP_DIRECT | GO:004589<br>2~negative regulation of transcription | 12 | 7.45 | 0.00 | ATF7IP, BCLAF1, EREG, STRN3, ARID5B, FOXF2, PATZ1, ARNTL, GFI1, ZEB1, HMGA2, KDM5C | 149 | 499 | 16792 | 2.71 | 0.99 | 0.68 | 7.19  |
| GOTERM_BP_DIRECT | GO:000646<br>8~protein phosphorylation              | 9  | 5.59 | 0.05 | MAP4K3, CCNT2, SGK1, TAOK1, ROCK2, MMD, WNK3, SIK1, MAP3K11                        | 149 | 456 | 16792 | 2.22 | 1.00 | 0.85 | 54.68 |
| GOTERM_BP_DIRECT | GO:000636<br>6~transcription from RNA               | 9  | 5.59 | 0.08 | CCNT2, RREB1, FOXF2, ASH1L, AFF4, SOX5, CREB5, NR3C1, HMGA2                        | 149 | 513 | 16792 | 1.98 | 1.00 | 0.90 | 74.98 |
| GOTERM_BP_DIRECT | GO:000706<br>7~mitotic nuclear                      | 8  | 4.97 | 0.01 | BOD1, SNX18, CLTA, ARHGEF2, TNKS, NR3C1, HMGA2, EML4                               | 149 | 248 | 16792 | 3.64 | 1.00 | 0.72 | 9.72  |
| GOTERM_BP_DIRECT | GO:001503<br>1~protein transport                    | 8  | 4.97 | 0.06 | TMEM115, EIF5AL1, ARF4, LRP1B, AAGAB, TNKS, ERC1, MYH9                             | 149 | 395 | 16792 | 2.28 | 1.00 | 0.87 | 62.72 |
| GOTERM_BP_DIRECT | GO:000688<br>6~intracellular protein                | 7  | 4.35 | 0.02 | XPO1, SNX18, CLTA, ARHGEF2, IPO7, STAM, NSF                                        | 149 | 236 | 16792 | 3.34 | 1.00 | 0.78 | 25.22 |
| GOTERM_BP_DIRECT | GO:004306<br>5~positive regulation                  | 7  | 4.35 | 0.05 | ARHGEF2, BCLAF1, RARG, MTCH1, RAC1, HMGA2, APC                                     | 149 | 300 | 16792 | 2.63 | 1.00 | 0.84 | 55.36 |
| GOTERM_BP_DIRECT | GO:005130<br>1~cell division                        | 7  | 4.35 | 0.09 | CCNT2, BOD1, CLTA, ARHGEF2, TNKS, NR3C1, HMGA2                                     | 149 | 350 | 16792 | 2.25 | 1.00 | 0.90 | 77.21 |
| GOTERM_BP_DIRECT | GO:000726<br>4~small GTPase mediated                | 6  | 3.73 | 0.07 | ARF4, RAC1, RHEB, TRIM23, RAB1A, RHOBTB3                                           | 149 | 246 | 16792 | 2.75 | 1.00 | 0.87 | 66.34 |
| GOTERM_BP_DIRECT | GO:000689<br>7~endocytosis                          | 5  | 3.11 | 0.03 | C9ORF72, SNX18, USP33, RAB1A, GHR                                                  | 149 | 139 | 16792 | 4.05 | 1.00 | 0.80 | 42.55 |
| GOTERM_BP_DIRECT | GO:001619<br>2~vesicle-mediated                     | 5  | 3.11 | 0.05 | CLTA, VAMP3, NSF, RAB1A, RHOBTB3                                                   | 149 | 152 | 16792 | 3.71 | 1.00 | 0.84 | 52.04 |



|                  |                                                           |   |      |      |                       |     |    |       |       |      |      |       |
|------------------|-----------------------------------------------------------|---|------|------|-----------------------|-----|----|-------|-------|------|------|-------|
| GOTERM_BP_DIRECT | GO:004584<br>0~positive regulation of mitotic             | 3 | 1.86 | 0.02 | PHIP, EREG, SH2B1     | 149 | 26 | 16792 | 13.00 | 1.00 | 0.76 | 29.36 |
| GOTERM_BP_DIRECT | GO:200014<br>5~regulation of cell                         | 3 | 1.86 | 0.03 | EREG, ROCK2, INPP5F   | 149 | 28 | 16792 | 12.07 | 1.00 | 0.77 | 32.99 |
| GOTERM_BP_DIRECT | GO:000028<br>1~mitotic                                    | 3 | 1.86 | 0.03 | SNX18, APC, MYH10     | 149 | 29 | 16792 | 11.66 | 1.00 | 0.75 | 34.82 |
| GOTERM_BP_DIRECT | GO:004800<br>8~platelet-derived growth factor             | 3 | 1.86 | 0.03 | ARID5B, GAB1, TIPARP  | 149 | 29 | 16792 | 11.66 | 1.00 | 0.75 | 34.82 |
| GOTERM_BP_DIRECT | GO:200123<br>7~negative regulation of extrinsic apoptotic | 3 | 1.86 | 0.04 | PHIP, ITGAV, SGMS1    | 149 | 38 | 16792 | 8.90  | 1.00 | 0.84 | 50.85 |
| GOTERM_BP_DIRECT | GO:004586<br>0~positive regulation of protein             | 3 | 1.86 | 0.06 | EREG, MMD, TAB2       | 149 | 47 | 16792 | 7.19  | 1.00 | 0.88 | 64.98 |
| GOTERM_BP_DIRECT | GO:004364<br>7~inositol phosphate metabolic               | 3 | 1.86 | 0.06 | ITPKB, IPMK, INPP5A   | 149 | 47 | 16792 | 7.19  | 1.00 | 0.88 | 64.98 |
| GOTERM_BP_DIRECT | GO:000725<br>4~JNK                                        | 3 | 1.86 | 0.07 | MAP4K3, TAB2, MAP3K11 | 149 | 49 | 16792 | 6.90  | 1.00 | 0.87 | 67.75 |
| GOTERM_BP_DIRECT | GO:004851<br>1~rhythmic                                   | 3 | 1.86 | 0.08 | ROCK2, SIK1, KDM5C    | 149 | 54 | 16792 | 6.26  | 1.00 | 0.90 | 74.02 |
| GOTERM_BP_DIRECT | GO:000717<br>3~epidermal growth factor                    | 3 | 1.86 | 0.09 | EREG, ARF4, GAB1      | 149 | 56 | 16792 | 6.04  | 1.00 | 0.90 | 76.27 |

|                  |                                                |   |      |      |                    |     |    |       |       |      |      |       |
|------------------|------------------------------------------------|---|------|------|--------------------|-----|----|-------|-------|------|------|-------|
| GOTERM_BP_DIRECT | GO:004340<br>1~steroid hormone mediated        | 3 | 1.86 | 0.09 | RARG, NR2F6, NR2C1 | 149 | 57 | 16792 | 5.93  | 1.00 | 0.89 | 77.34 |
| GOTERM_BP_DIRECT | GO:004573<br>2~positive regulation of protein  | 3 | 1.86 | 0.10 | TIPARP, NSF, APC   | 149 | 60 | 16792 | 5.63  | 1.00 | 0.90 | 80.34 |
| GOTERM_BP_DIRECT | GO:004423<br>6~multicellular organism          | 2 | 1.24 | 0.02 | TIPARP, GHR        | 149 | 2  | 16792 | ##### | 1.00 | 0.79 | 24.33 |
| GOTERM_BP_DIRECT | GO:000645<br>2~translational                   | 2 | 1.24 | 0.03 | EIF5AL1, EIF5A     | 149 | 3  | 16792 | 75.13 | 1.00 | 0.76 | 34.18 |
| GOTERM_BP_DIRECT | GO:200007<br>4~regulation of type B pancreatic | 2 | 1.24 | 0.03 | RHEB, ARNTL        | 149 | 3  | 16792 | 75.13 | 1.00 | 0.76 | 34.18 |
| GOTERM_BP_DIRECT | GO:004590<br>5~positive regulation of          | 2 | 1.24 | 0.03 | EIF5AL1, EIF5A     | 149 | 3  | 16792 | 75.13 | 1.00 | 0.76 | 34.18 |
| GOTERM_BP_DIRECT | GO:004297<br>7~activation of JAK2              | 2 | 1.24 | 0.03 | PRLR, GHR          | 149 | 3  | 16792 | 75.13 | 1.00 | 0.76 | 34.18 |
| GOTERM_BP_DIRECT | GO:004590<br>1~positive regulation of          | 2 | 1.24 | 0.03 | EIF5AL1, EIF5A     | 149 | 4  | 16792 | 56.35 | 1.00 | 0.79 | 42.74 |
| GOTERM_BP_DIRECT | GO:006061<br>3~fat pad                         | 2 | 1.24 | 0.05 | ARID5B, HMGA2      | 149 | 6  | 16792 | 37.57 | 1.00 | 0.84 | 56.67 |
| GOTERM_BP_DIRECT | GO:007238<br>3~plus-ended- directed vesicle    | 2 | 1.24 | 0.06 | KIF5B, FYCO1       | 149 | 7  | 16792 | 32.20 | 1.00 | 0.88 | 62.31 |

|                      |                                                      |   |      |      |               |     |    |       |       |      |      |       |
|----------------------|------------------------------------------------------|---|------|------|---------------|-----|----|-------|-------|------|------|-------|
| GOTERM_<br>BP_DIRECT | GO:002179<br>9~cerebral<br>cortex<br>radially        | 2 | 1.24 | 0.08 | RAC1, FBXO45  | 149 | 9  | 16792 | 25.04 | 1.00 | 0.89 | 71.49 |
| GOTERM_<br>BP_DIRECT | GO:200102<br>2~positive<br>regulation<br>of response | 2 | 1.24 | 0.08 | BCLAF1, HMGA2 | 149 | 10 | 16792 | 22.54 | 1.00 | 0.90 | 75.20 |
| GOTERM_<br>BP_DIRECT | GO:004801<br>6~inositol<br>phosphate-<br>mediated    | 2 | 1.24 | 0.09 | ITPR3, INPP5A | 149 | 11 | 16792 | 20.49 | 1.00 | 0.90 | 78.43 |

GOTERM\_ GO:000563  
CC\_DIRECT 4~nucleus  
T

72 44.72

0.00

CCNT2, XPO1, C9ORF72, OSBP, CPEB2, FIGNL1,  
ZNF676, EIF5A, ITPKB, ZEB2, ZEB1, SGMS1,  
ACBD5, NFATC2IP, DIP2A, PCGF3, ZNF682,  
FOXF2, NR2F6, PSIP1, QKI, RBM47, PATZ1, SIK1,  
IPMK, KDM5C, MTUS1, RBMS1, GHR, ATF7IP,  
SGK1, ZBTB20, RARG, RREB1, ROCK2, ARID5B,  
STRN3, MBD6, BTBD7, ARNTL, HMGA2, MYH9,  
BRWD3, ASH1L, JMJD1C, LCOR, BCLAF1, TIPARP,  
SOX5, ZNF367, NR3C1, NR2C1, PHIP, RAC1,  
SH2B1, GFI1, TSEN34, HECTD1, APC, KAT7, PELI1,  
ZBTB41, PPP1R10, CREB5, TRIM23, TMEM115,  
RLF, TET3, ATXN7, BNC2, RERE, MYH10

153 5415 18224 1.58 0.00 0.00 0.01





|                      |                          |    |       |      |                                                                                                                                                                                                                                                                                             |     |      |       |      |      |      |      |
|----------------------|--------------------------|----|-------|------|---------------------------------------------------------------------------------------------------------------------------------------------------------------------------------------------------------------------------------------------------------------------------------------------|-----|------|-------|------|------|------|------|
| GOTERM_<br>CC_DIRECT | GO:0005829~cytosol       | 42 | 26.09 | 0.00 | XPO1, CLTA, OSBP, EIF5A, ITPKB, RAB1A, ARHGAP12, TAGAP, AKT1S1, GAB1, RAC1, PUM1, AAGAB, PSIP1, TNKS, STAM, SH2B1, FBXO3, PIK3R6, FNDC3A, NSF, RHOBTB3, APC, FMNL2, SGK1, PELI1, ARHGEF2, OSBPL3, TAOK1, CEP192, ROCK2, WNK3, PFKM, MARK3, MYH9, TAB2, IPO7, ARF4, PGM1, RHEB, VAMP3, MYH10 | 153 | 3315 | 18224 | 1.51 | 0.66 | 0.14 | 5.83 |
| GOTERM_<br>CC_DIRECT | GO:0016020~membrane      | 30 | 18.63 | 0.01 | XPO1, CLTA, OSBP, MMGT1, UTRN, MMD, EIF5A, ITPKB, SGMS1, ACBD5, STAU1, ITGAV, RAC1, MTCH1, PIK3R6, SH2B1, FYCO1, FNDC3A, INPP5A, MGAT4A, OSBPL3, KIF5B, MYH9, ITPR3, EML4, ATP2A2, IPO7, ARF4, RHEB, MAP3K11                                                                                | 153 | 2200 | 18224 | 1.62 | 0.85 | 0.21 | 9.93 |
| GOTERM_<br>CC_DIRECT | GO:0005622~intracellular | 23 | 14.29 | 0.00 | XPO1, TWF1, ARHGEF2, ROCK2, ZNF676, RAB1A, MAP4K3, ZNF682, EREG, IPO7, ITGAV, MTCH1, RAC1, ARF4, RHEB, VAMP3, STAM, JMJD1C, SH2B1, INPP5A, GHR, MAP3K11, RHOBTB3                                                                                                                            | 153 | 1332 | 18224 | 2.06 | 0.31 | 0.07 | 2.01 |





|                                                                 |                       |                                                                                                                                                                                                                                                                                                                                                                                                                                                                                                                                                                                                                                                                                                                                                                                                                                                                                            |                                           |
|-----------------------------------------------------------------|-----------------------|--------------------------------------------------------------------------------------------------------------------------------------------------------------------------------------------------------------------------------------------------------------------------------------------------------------------------------------------------------------------------------------------------------------------------------------------------------------------------------------------------------------------------------------------------------------------------------------------------------------------------------------------------------------------------------------------------------------------------------------------------------------------------------------------------------------------------------------------------------------------------------------------|-------------------------------------------|
| <p>GOTERM_ GO:000551<br/> MF_DIREC 5~protein<br/> T binding</p> | <p>110 68.32 0.00</p> | <p>XPO1, UTRN, EIF5A, ITPKB, RAB1A, GAB1, PUM1,<br/> AAGAB, PSIP1, STAM, ELOVL7, RBMS1, FLVCR1,<br/> PPP1R37, RPUUSD4, RARG, KIF5B, ROCK2, STRN3,<br/> WNK3, SYNJ2BP, ARNTL, MYH9, MARK3, MAP4K3,<br/> CCDC6, BAZ1A, PGM1, VAMP3, ERC1, EP400,<br/> SOX5, NR2C1, ALCAM, AKT1S1, ITGAV, MTCH1,<br/> RAC1, TNKS, FBXO3, FBXO45, HECTD1, RHOBTB3,<br/> KAT7, PELI1, OSBPL3, TAOK1, TEAD1, TMEM115,<br/> TET3, ATP2A2, ARF4, RERE, MYH10, CCNT2,<br/> C9ORF72, CLTA, OSBP, FIGNL1, ZEB2, ZEB1,<br/> DIP2A, PCGF3, TMEM59, NR2F6, QKI, SIK1, NSF,<br/> GHR, ATF7IP, SGK1, ARHGEF2, ARID5B, PFKM,<br/> HMGA2, FAM114A1, EREG, IPO7, JMJD1C, LCOR,<br/> MAP3K11, SNX18, BCLAF1, NR3C1, SMUG1,<br/> STAU1, PHIP, INPP5F, MTMR9, SH2B1, PIK3R6,<br/> GFI1, FYCO1, MANBAL, USP33, INPP5A, APC,<br/> CEP192, AFF4, CREB5, AFF1, TRIM23, ITPR3, TAB2,<br/> RASSF3, RLF, PPP1R2, PRLR, ATXN7, TMTC3</p> | <p>149 8785 16881 1.42 0.00 0.00 0.00</p> |
|-----------------------------------------------------------------|-----------------------|--------------------------------------------------------------------------------------------------------------------------------------------------------------------------------------------------------------------------------------------------------------------------------------------------------------------------------------------------------------------------------------------------------------------------------------------------------------------------------------------------------------------------------------------------------------------------------------------------------------------------------------------------------------------------------------------------------------------------------------------------------------------------------------------------------------------------------------------------------------------------------------------|-------------------------------------------|

|                    |                                  |    |       |      |                                                                                                                                                                                                  |     |      |       |      |      |      |       |
|--------------------|----------------------------------|----|-------|------|--------------------------------------------------------------------------------------------------------------------------------------------------------------------------------------------------|-----|------|-------|------|------|------|-------|
| GOTERM_ MF_DIREC T | GO:000367<br>7~DNA binding       | 28 | 17.39 | 0.00 | BCLAF1, SOX5, ZNF367, ZEB2, NR3C1, ZEB1, SMUG1, NR2C1, FOXF2, NR2F6, PATZ1, KDM5C, ZBTB20, RARG, ARID5B, MBD6, ZBTB41, PPP1R10, TEAD1, ARNTL, HMGA2, RLF, TET3, BNC2, ASH1L, LCOR, EP400, RERE   | 149 | 1674 | 16881 | 1.90 | 0.34 | 0.19 | 1.76  |
| GOTERM_ MF_DIREC T | GO:004687<br>2~metal ion binding | 27 | 16.77 | 0.04 | TIPARP, ZNF676, ZNF367, ZEB2, ZEB1, PCGF3, ZNF682, ITGAV, PATZ1, GFI1, FYCO1, NSF, HECTD1, MGAT4A, ARHGEF2, ZBTB20, RREB1, ROCK2, ZBTB41, PPP1R10, CREB5, PFKM, PRLR, ATP2A2, BNC2, RHEB, JMJD1C | 149 | 2069 | 16881 | 1.48 | 1.00 | 0.62 | 39.45 |
| GOTERM_ MF_DIREC T | GO:000827<br>0~zinc ion binding  | 20 | 12.42 | 0.01 | ARHGEF2, KAT7, RARG, UTRN, NR3C1, ZEB1, TRIM23, TAB2, NR2C1, RLF, TET3, PCGF3, BAZ1A, BNC2, ASH1L, NR2F6, TNKS, USP33, KDM5C, RERE                                                               | 149 | 1169 | 16881 | 1.94 | 0.88 | 0.50 | 8.63  |
| GOTERM_ MF_DIREC T | GO:000552<br>4~ATP binding       | 20 | 12.42 | 0.06 | TWF1, SGK1, KIF5B, ROCK2, FIGNL1, TAOK1, ITPKB, WNK3, PFKM, MYH9, MARK3, MAP4K3, ATP2A2, SIK1, IPMK, NSF, EP400, MAP3K11, MYH10, RHOBTB3                                                         | 149 | 1495 | 16881 | 1.52 | 1.00 | 0.72 | 58.90 |

|                  |                                                                 |    |       |      |                                                                                                                 |     |     |       |      |      |      |       |
|------------------|-----------------------------------------------------------------|----|-------|------|-----------------------------------------------------------------------------------------------------------------|-----|-----|-------|------|------|------|-------|
| GOTERM_MF_DIRECT | GO:000370<br>0~transcription factor activity, sequence-specific | 17 | 10.56 | 0.01 | KAT7, RARG, RREB1, STRN3, AFF4, SOX5, TEAD1, ZNF367, CREB5, NR3C1, AFF1, ARNTL, ZEB1, NR2C1, FOXF2, NR2F6, RERE | 149 | 961 | 16881 | 2.00 | 0.96 | 0.55 | 12.85 |
| GOTERM_MF_DIRECT | GO:000367<br>6~nucleic acid binding                             | 14 | 8.70  | 0.09 | ZBTB20, CPEB2, RREB1, ZNF676, ZBTB41, CREB5, ZEB2, ZEB1, ZNF682, PATZ1, RBM47, GF11, TSEN34, RBMS1              | 149 | 985 | 16881 | 1.61 | 1.00 | 0.78 | 72.62 |
| GOTERM_MF_DIRECT | GO:000467<br>4~protein serine/threonine kinase                  | 9  | 5.59  | 0.02 | MAP4K3, CCNT2, SGK1, TAOK1, ROCK2, WNK3, MARK3, SIK1, MAP3K11                                                   | 149 | 376 | 16881 | 2.71 | 1.00 | 0.55 | 21.55 |
| GOTERM_MF_DIRECT | GO:000368<br>2~chromatin binding                                | 9  | 5.59  | 0.02 | CCNT2, ATXN7, ASH1L, PSIP1, MBD6, PATZ1, ZEB1, EP400, RERE                                                      | 149 | 391 | 16881 | 2.61 | 1.00 | 0.58 | 25.87 |
| GOTERM_MF_DIRECT | GO:001990<br>1~protein kinase                                   | 8  | 4.97  | 0.05 | CCNT2, UTRN, RAC1, RHEB, SIK1, NSF, GHR, APC                                                                    | 149 | 376 | 16881 | 2.41 | 1.00 | 0.69 | 48.32 |
| GOTERM_MF_DIRECT | GO:000392<br>4~GTPase activity                                  | 6  | 3.73  | 0.06 | ARF4, RAC1, RHEB, TRIM23, RAB1A, MMAA                                                                           | 149 | 234 | 16881 | 2.91 | 1.00 | 0.72 | 53.43 |
| GOTERM_MF_DIRECT | GO:001630<br>1~kinase activity                                  | 6  | 3.73  | 0.06 | MAP4K3, TAOK1, SGMS1, PIK3R6, TAB2, MAP3K11                                                                     | 149 | 241 | 16881 | 2.82 | 1.00 | 0.73 | 57.19 |
| GOTERM_MF_DIRECT | GO:001713<br>7~Rab                                              | 5  | 3.11  | 0.03 | C9ORF72, RAC1, ERC1, NSF, RHOBTB3                                                                               | 149 | 134 | 16881 | 4.23 | 1.00 | 0.62 | 33.90 |
| GOTERM_MF_DIRECT | GO:000370<br>7~steroid hormone                                  | 4  | 2.48  | 0.01 | RARG, NR2F6, NR3C1, NR2C1                                                                                       | 149 | 56  | 16881 | 8.09 | 0.98 | 0.56 | 16.16 |

|                  |                                                                           |   |      |      |                                           |     |     |       |       |      |      |       |
|------------------|---------------------------------------------------------------------------|---|------|------|-------------------------------------------|-----|-----|-------|-------|------|------|-------|
| GOTERM_MF_DIRECT | GO:000122<br>7~transcriptional repressor activity, RNA polymerase II      | 4 | 2.48 | 0.02 | ARID5B, NR2F6, ZEB2, ZEB1                 | 149 | 59  | 16881 | 7.68  | 0.99 | 0.54 | 18.38 |
| GOTERM_MF_DIRECT | GO:000107<br>8~transcriptional repressor activity, RNA polymerase II core | 4 | 2.48 | 0.07 | ZBTB20, GFI1, HMGA2, NR2C1                | 149 | 111 | 16881 | 4.08  | 1.00 | 0.73 | 64.39 |
| GOTERM_MF_DIRECT | GO:001704<br>8~Rho                                                        | 3 | 1.86 | 0.02 | FMNL2, ARHGEF2, ROCK2                     | 149 | 28  | 16881 | 12.14 | 1.00 | 0.58 | 28.69 |
| GOTERM_MF_DIRECT | GO:000486<br>4~protein phosphatases                                       | 3 | 1.86 | 0.03 | PPP1R37, PPP1R2, PPP1R10                  | 149 | 33  | 16881 | 10.30 | 1.00 | 0.62 | 36.95 |
| GOTERM_MF_DIRECT | GO:004302<br>2~ribosomal                                                  | 3 | 1.86 | 0.07 | CPEB2, EIF5AL1, EIF5A                     | 149 | 51  | 16881 | 6.66  | 1.00 | 0.75 | 64.22 |
| GOTERM_MF_DIRECT | GO:000844<br>0~inositol-1,4,5-trisphosphate                               | 2 | 1.24 | 0.08 | ITPKB, IPMK                               | 149 | 10  | 16881 | 22.66 | 1.00 | 0.76 | 69.36 |
| KEGG_PATHWAY     | hsa04151:PI3K-Akt signaling                                               | 7 | 4.35 | 0.06 | SGK1, PRLR, ITGAV, RAC1, RHEB, CREB5, GHR | 57  | 345 | 6879  | 2.45  | 1.00 | 0.95 | 52.23 |
| KEGG_PATHWAY     | hsa05205:Proteoglycans                                                    | 5 | 3.11 | 0.08 | ROCK2, ITGAV, GAB1, RAC1, ITPR3           | 57  | 200 | 6879  | 3.02  | 1.00 | 0.91 | 62.52 |
| KEGG_PATHWAY     | hsa04972:Pancreatic                                                       | 4 | 2.48 | 0.04 | ATP2A2, PLA2G12A, RAC1, ITPR3             | 57  | 93  | 6879  | 5.19  | 1.00 | 1.00 | 38.23 |
| KEGG_PATHWAY     | hsa04070:Phosphatidylinositol                                             | 4 | 2.48 | 0.05 | ITPKB, ITPR3, IPMK, INPP5A                | 57  | 98  | 6879  | 4.93  | 1.00 | 0.97 | 42.34 |

|              |            |   |      |      |                            |    |     |      |      |      |      |       |
|--------------|------------|---|------|------|----------------------------|----|-----|------|------|------|------|-------|
| KEGG_PATHWAY | hsa04152:A | 4 | 2.48 | 0.08 | AKT1S1, RHEB, CREB5, PFKM  | 57 | 123 | 6879 | 3.92 | 1.00 | 0.95 | 62.05 |
| KEGG_PATHWAY | hsa04728:D | 4 | 2.48 | 0.09 | KIF5B, CREB5, ARNTL, ITPR3 | 57 | 128 | 6879 | 3.77 | 1.00 | 0.89 | 65.61 |

---
